# Supplementary material for: Experimental and Theoretical Investigation on the Thermochemistry of 3-Methyl-2-benzoxazolinone and 6-Nitro-2-benzoxazolinone
Source: MDPI journal article supplement (doi:10.3390/molecules27010024), 2021-12-21
Supplement: s1 [file s1]

# SUPPLEMENTARY INFORMATION

## Experimental and theoretical investigation on the thermochemistry of 3-methyl-2-benzoxazolinone and 6-nitro-2-benzoxazolinone

Ana L.R. Silva\*, Vânia M. S. Costa, Maria D.M.C. Ribeiro da Silva

Research Center in Chemistry – CIQUP, Department of Chemistry and Biochemistry.  
Faculty of Sciences, University of Porto, Rua do Campo Alegre, 687, P-4169-007, Porto.  
Portugal

\* Corresponding author:

analuisa.rs@fc.up.pt

This supplementary information includes:

- data of all the combustion calorimetry experiments of 3-methyl-2-benzoxazolinone and 6-nitro-2-benzoxazolinone (**Tables S1 and S2**);
- the values of standard molar heat capacities in the gaseous phase for the compounds studied (**Tables S3 and S4**);
- optimized geometries of 2-benzoxazolinone derivatives, calculated at the B3LYP/6-31G(d) level of theory (**Figure S1**);
- Gas-phase hypothetical reactions and corresponding values for the enthalpies of reaction and formation, in the gaseous phase, at  $T = 298.15$  K for 3-methyl-2-benzoxazolinone, 6-nitro-2-benzoxazolinone and 2-benzoxazolinone (**Tables S5-S7**);
- G3MP2B3 calculated absolute enthalpies, at  $T = 298.15$  K, and experimental gas-phase values for all the molecules used (**Table S8**);
- Harmonic vibrational frequencies for 2-benzoxazolinone, 3-methyl-2-benzoxazolinone and 6-nitro-2-benzoxazolinone (**Table S9**).

### Acronyms used throughout this supplementary data:

**3MBOA** for 3-methyl-2-benzoxazolinone

**6NBOA** for 6-nitro-2(3*H*)benzoxazolone

### Combustion Calorimetry:

- The calibration experiments were made in an oxygen atmosphere at  $p = 3.04$  MPa, with  $1.00\text{ cm}^3$  of deionized water added to the bomb; the energy equivalent of the calorimeter was determined from the combustion of benzoic acid (NIST SRM 39j) having a massic energy of combustion, under standard bomb conditions, of  $-(26434 \pm 3)\text{ J}\cdot\text{g}^{-1}$ . From six calibration experiments  $\varepsilon_{\text{cal}} = (16002.6 \pm 1.7)\text{ J}\cdot\text{K}^{-1}$ , for an average mass of water added to the calorimeter of  $3119.6\text{ g}$ ; the mentioned uncertainty is the standard deviation of the mean.
- Samples of both compounds were burnt in pellet form, under oxygen at  $p = 3.04$  MPa, with  $1.00\text{ cm}^3$  of deionised water added to the bomb; in the experiments of 6NBOA, a small amount of n-hexadecane (auxiliary of combustion) was used.
- n-Hexadecane (Aldrich, mass fraction  $> 0.999$ ), stored under nitrogen was used as auxiliary combustion. The massic energy of combustion of the sample used, was determined in our laboratory as  $\Delta_c u^\circ = -(47136.7 \pm 2.3)\text{ J}\cdot\text{g}^{-1}$ .
- The cotton thread fuse (empirical formula:  $\text{CH}_{1.686}\text{O}_{0.843}$ ) had a standard massic energy of combustion [S1],  $\Delta_c u^\circ = -16240\text{ J}\cdot\text{g}^{-1}$ ;
- The ignition energy was determined from the change in potential difference on discharge of a  $1400\text{ }\mu\text{F}$  condenser across a platinum wire.
- Pressure coefficient of specific energy  $(\partial u/\partial p)_T = -0.2\text{ J}\cdot\text{g}^{-1}\cdot\text{MPa}^{-1}$  (typical value for organic compounds [S2]).
- The nitric acid formed in the calorimetric experiments was determined using Devarda's alloy method [S3] and the energy correction for the formation of  $0.1\text{ mol}\cdot\text{dm}^{-3}\text{ HNO}_3(\text{aq})$  [S4] from  $\text{N}_2(\text{g})$ ,  $\text{O}_2(\text{g})$  and  $\text{H}_2\text{O}(\text{l})$  was based on  $-59.7\text{ kJ}\cdot\text{mol}^{-1}$ .
- Corrections for carbon formation relied on the standard massic energy of combustion of carbon [S5],  $\Delta_c u^\circ = -32.76\text{ kJ}\cdot\text{g}^{-1}$ .
- The calorimeter temperatures were measured to  $\pm(1\times 10^{-4})\text{ K}$ , at time intervals of  $10\text{ s}$ , with a quartz crystal thermometer (Hewlett-Packard HP 2804 A), interfaced to a PC; the ignition occurs at  $T = (298.150 \pm 0.001)\text{ K}$ .
- Specific density of the studied compounds at  $T = 298.15\text{ K}$ :  
 $\rho = 1.0831\text{ g}\cdot\text{cm}^{-3}$  for 3MBOA [S6] and  $\rho = 1.58\text{ g}\cdot\text{cm}^{-3}$  for 6NBOA [S7].
- The massic heat capacities, at  $T = 298.15\text{ K}$ , were calculated as  $1.245\text{ J}\cdot\text{K}^{-1}\cdot\text{g}^{-1}$  for 3MBOA and as  $1.097\text{ J}\cdot\text{K}^{-1}\cdot\text{g}^{-1}$  for 6NBOA, using Kopp's rule [S8].

**Table S1.** Standard ( $p^\circ = 0.1$  MPa) mass energy of combustion of crystalline **3MBOA**, at  $T = 298.15$  K.

|                                                                                           |          |          |          |          |          |          |
|-------------------------------------------------------------------------------------------|----------|----------|----------|----------|----------|----------|
| $m(\text{CO}_2, \text{total}) / \text{g}$                                                 | 1.44346  | 1.42080  | 1.77570  | 1.44647  | 1.52305  | 1.50243  |
| $m(\text{cpd}) / \text{g}$                                                                | 0.60941  | 0.59983  | 0.75045  | 0.61080  | 0.64339  | 0.63460  |
| $m(\text{fuse}) / \text{g}$                                                               | 0.00301  | 0.00298  | 0.00257  | 0.00284  | 0.00262  | 0.00270  |
| $T_i / \text{K}$                                                                          | 298.1504 | 298.1514 | 298.1592 | 298.1524 | 298.1512 | 298.1507 |
| $T_f / \text{K}$                                                                          | 299.2100 | 299.1984 | 299.4260 | 299.2116 | 299.2640 | 299.2570 |
| $\Delta T_{\text{ad}} / \text{K}$                                                         | 0.98107  | 0.96581  | 1.20624  | 0.98357  | 1.03534  | 1.02109  |
| $\varepsilon_i / (\text{J} \cdot \text{K}^{-1})$                                          | 15.27    | 15.26    | 15.43    | 15.27    | 15.31    | 15.30    |
| $\varepsilon_f / (\text{J} \cdot \text{K}^{-1})$                                          | 15.67    | 15.58    | 15.97    | 15.65    | 15.66    | 15.68    |
| $-\Delta U(\text{IBP}) / \text{J}$                                                        | 15713.90 | 15469.82 | 19321.53 | 15754.06 | 16583.72 | 16355.35 |
| $\Delta U(\text{HNO}_3) / \text{J}$                                                       | 27.22    | 33.73    | 29.25    | 28.84    | 35.58    | 31.46    |
| $\Delta U(\text{ign}) / \text{J}$                                                         | 1.15     | 0.70     | 0.71     | 1.02     | 0.63     | 0.76     |
| $\Delta U_\Sigma / \text{J}$                                                              | 12.00    | 11.76    | 15.07    | 12.02    | 12.69    | 12.52    |
| $-\Delta U(\text{fuse}) / \text{J}$                                                       | 48.88    | 48.40    | 41.74    | 46.12    | 42.55    | 43.85    |
| $-\Delta_c u^\circ / (\text{J} \cdot \text{g}^{-1})$                                      | 25640.85 | 25633.74 | 25631.77 | 25649.99 | 25634.31 | 25634.21 |
| $\% \text{ CO}_2 = (100.008 \pm 0.001)^a$                                                 |          |          |          |          |          |          |
| $-\langle \Delta_c u^\circ \rangle = (25637.48 \pm 6.86) \text{ J} \cdot \text{g}^{-1}^a$ |          |          |          |          |          |          |

$m(\text{CO}_2, \text{total})$  is the total mass of  $\text{CO}_2$  recovered in the experiment;  $m(\text{cpd})$  is the mass of compound burnt in each experiment;  $m(\text{fuse})$  is the mass of fuse (cotton) used in each experiment;  $T_i$  is the initial temperature rise;  $T_f$  is the final temperature rise;  $\Delta T_{\text{ad}}$  is the corrected temperature rise;  $\varepsilon_i$  and  $\varepsilon_f$  are the energy equivalents of contents in the initial and final states, respectively;  $\Delta U(\text{IBP})$  is the energy change for the isothermal combustion reaction under actual bomb conditions and includes  $\Delta U(\text{ign})$ ;  $\Delta U(\text{HNO}_3)$  is the energy correction for the nitric acid formation;  $\Delta U(\text{ign})$  is the electrical energy for ignition;  $\Delta U_\Sigma$  is the standard state correction;  $\Delta U(\text{fuse})$  is the energy of combustion of the fuse (cotton);  $\Delta_c u^\circ$  is the standard massic energy of combustion. <sup>a</sup> Mean value and standard deviation of the six experiments.

**Table S2.** Standard ( $p^\circ = 0.1$  MPa) mass energy of combustion of crystalline **6NBOA**, at  $T = 298.15$  K.

|                                                      |          |          |          |          |          |          |
|------------------------------------------------------|----------|----------|----------|----------|----------|----------|
| $m(\text{CO}_2, \text{total}) / \text{g}$            | 1.06543  | 1.31205  | 1.02819  | 1.28084  | 1.26352  | 1.26658  |
| $m(\text{cpd}) / \text{g}$                           | 0.62026  | 0.51303  | 0.52849  | 0.52977  | 0.51087  | 0.52546  |
| $m(\text{fuse}) / \text{g}$                          | 0.00281  | 0.00265  | 0.00301  | 0.00302  | 0.00291  | 0.0019   |
| $m(\text{n-hexadec.}) / \text{g}$                    | —        | 0.13837  | 0.03899  | 0.11927  | 0.12417  | 0.11731  |
| $T_i / \text{K}$                                     | 298.1506 | 298.1514 | 298.1506 | 298.1509 | 298.1513 | 298.1506 |
| $T_f / \text{K}$                                     | 298.8918 | 299.1725 | 298.9076 | 299.1394 | 299.1308 | 299.125  |
| $\Delta T_{\text{ad}} / \text{K}$                    | 0.64406  | 0.94067  | 0.66342  | 0.90169  | 0.89586  | 0.89061  |
| $\varepsilon_i / (\text{J} \cdot \text{K}^{-1})$     | 15.20    | 15.39    | 14.91    | 15.37    | 15.36    | 15.08    |
| $\varepsilon_f / (\text{J} \cdot \text{K}^{-1})$     | 15.23    | 15.74    | 15.00    | 15.68    | 15.69    | 15.38    |
| $-\Delta U(\text{IBP}) / \text{J}$                   | 10315.53 | 15067.22 | 10625.74 | 14443.04 | 14349.52 | 14264.63 |
| $\Delta U(\text{HNO}_3) / \text{J}$                  | 27.34    | 35.58    | 29.31    | 34.15    | 32.48    | 33.49    |
| $\Delta U(\text{ign}) / \text{J}$                    | 0.91     | 0.75     | 0.66     | 0.48     | 0.63     | 1.14     |
| $\Delta U_{\Sigma} / \text{J}$                       | 12.32    | 11.79    | 10.88    | 11.91    | 11.57    | 11.78    |
| $\Delta U(\text{carb.}) / \text{J}$                  | —        | —        | 16.50    | 9.24     | 9.90     | —        |
| $-\Delta U(\text{n-hexadec.}) / \text{J}$            | —        | 6522.37  | 1837.78  | 5621.89  | 5853.14  | 5529.38  |
| $-\Delta U(\text{fuse}) / \text{J}$                  | 45.63    | 43.04    | 48.88    | 49.04    | 47.26    | 30.86    |
| $-\Delta_c u^\circ / (\text{J} \cdot \text{g}^{-1})$ | 16493.48 | 16479.43 | 16491.11 | 16488.84 | 16471.83 | 16479.13 |

$$\% \text{ CO}_2 = (100.06 \pm 0.02)^b$$

$$-\langle \Delta_c u^\circ \rangle = (16483.97 \pm 3.45) \text{ J} \cdot \text{g}^{-1}{}^b$$

$m(\text{CO}_2, \text{total})$  is the total mass of  $\text{CO}_2$  recovered in the experiment;  $m(\text{cpd})$  is the mass of compound burnt in each experiment;  $m(\text{fuse})$  is the mass of fuse (cotton) used in each experiment;  $m(\text{n-hexadec.})$  is the mass of n-hexadecane used in each experiment;  $T_i$  and  $T_f$  are the initial and final temperatures rise, respectively;  $\Delta T_{\text{ad}}$  is the corrected temperature rise;  $\varepsilon_i$  and  $\varepsilon_f$  are the energy equivalents of contents in the initial and final states, respectively;  $\Delta U(\text{IBP})$  is the energy change for the isothermal combustion reaction under actual bomb conditions and includes  $\Delta U(\text{ign})$ ;  $\Delta U(\text{HNO}_3)$  is the energy correction for the nitric acid formation;  $\Delta U(\text{ign})$  is the electrical energy for ignition;  $\Delta U_{\Sigma}$  is the standard state correction;  $\Delta U(\text{carb.})$  is the correction energy for carbon soot formation;  $\Delta U(\text{n-hexadec.})$  is the energy of combustion of the n-hexadecane;  $\Delta U(\text{fuse})$  is the energy of combustion of the fuse (cotton);  $\Delta_c u^\circ$  is the standard massic energy of combustion.<sup>a</sup> Mean value and standard deviation of the mean.

**Table S3.** Standard ( $p^\circ = 0.1$  MPa) molar heat capacities in the gaseous phase for **3MBOA** .

| $T / \text{K}$ | $C_{p, \text{m}}^\circ (\text{g}) / (\text{J} \cdot \text{K}^{-1} \cdot \text{mol}^{-1})$ |
|----------------|-------------------------------------------------------------------------------------------|
| 150            | 84.72                                                                                     |
| 200            | 106.70                                                                                    |
| 250            | 129.97                                                                                    |
| 298.15         | 152.58                                                                                    |
| 300            | 153.44                                                                                    |
| 350            | 176.09                                                                                    |
| 400            | 197.25                                                                                    |
| 450            | 216.59                                                                                    |
| 500            | 234.06                                                                                    |
| 550            | 249.73                                                                                    |

$$C_{p, \text{m}}^\circ (\text{g}) = -6.769 \times 10^{-7} T^3 + 4.907 \times 10^{-4} T^2 + 3.449 \times 10^{-1} T + 23.94$$

**Table S4.** Standard ( $p^\circ = 0.1$  MPa) molar heat capacities in the gaseous phase for **6NBOA** .

| $T / \text{K}$ | $C_{p, \text{m}}^\circ (\text{g}) / (\text{J} \cdot \text{K}^{-1} \cdot \text{mol}^{-1})$ |
|----------------|-------------------------------------------------------------------------------------------|
| 300            | 167.55                                                                                    |
| 350            | 190.26                                                                                    |
| 400            | 210.83                                                                                    |
| 450            | 229.21                                                                                    |
| 500            | 245.46                                                                                    |
| 550            | 259.79                                                                                    |
| 600            | 272.42                                                                                    |
| 650            | 283.57                                                                                    |
| 700            | 293.44                                                                                    |

$$C_{p, \text{m}}^\circ (\text{g}) = 2.249 \times 10^{-7} T^3 - 7.113 \times 10^{-4} T^2 + 8.484 \times 10^{-1} T - 29.07$$

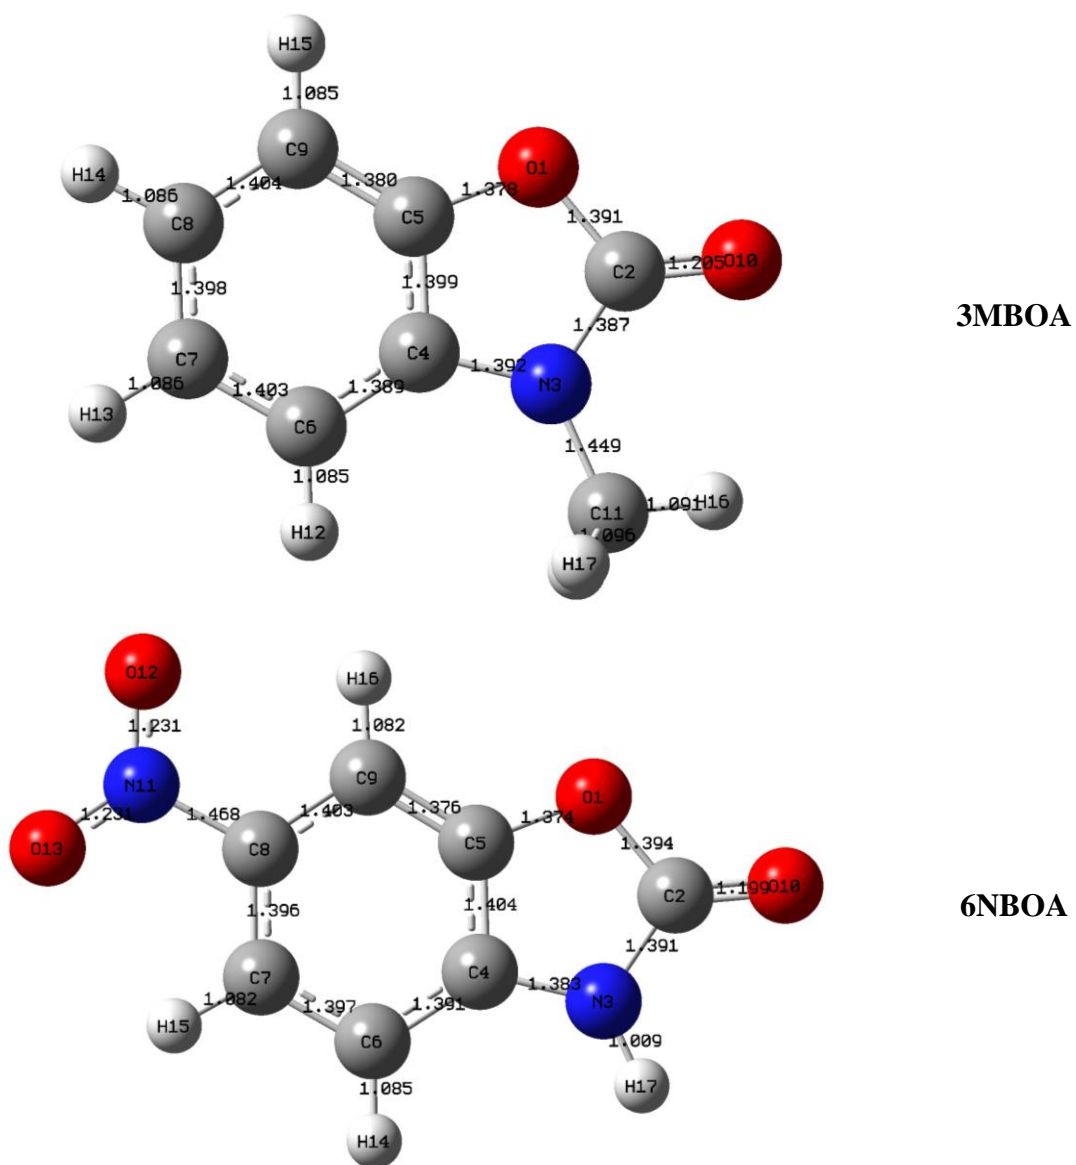

**Figure S1.** Molecular structure of the compounds studied in the gaseous phase, optimized by B3LYP/6-31G(d) level of theory, with the corresponding calculated bond distances ( $10^{-10}$  m).

**Table S5.** Gas-phase hypothetical reactions for **3MBOA** and corresponding values for the enthalpies of reaction  $\Delta_r H_m^\circ$ , and formation,  $\Delta_f H_m^\circ$ , in the gaseous phase, at  $T = 298.15$  K (values in  $\text{kJ}\cdot\text{mol}^{-1}$ ).

| Gas-phase hypothetical reactions                                                                                                                                                                                  | Eq. | $\Delta_r H_m^\circ$ | $\Delta_f H_m^\circ$          |
|-------------------------------------------------------------------------------------------------------------------------------------------------------------------------------------------------------------------|-----|----------------------|-------------------------------|
| 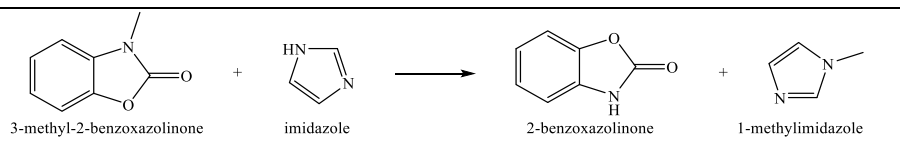 <p>3-methyl-2-benzoxazolinone + imidazole <math>\longrightarrow</math> 2-benzoxazolinone + 1-methylimidazole</p>               | I   | 10.10                | -236.3                        |
|  <p>3-methyl-2-benzoxazolinone + pyrrole <math>\longrightarrow</math> 2-benzoxazolinone + 1-methylpyrrole</p>                   | II  | 11.46                | -235.8                        |
|  <p>3-methyl-2-benzoxazolinone + indole <math>\longrightarrow</math> 2-benzoxazolinone + 1-methylindole</p>                     | III | 7.83                 | -235.3                        |
|  <p>3-methyl-2-benzoxazolinone + 2-pyrrolidinone <math>\longrightarrow</math> 2-benzoxazolinone + 1-methyl-2-pyrrolidinone</p> | IV  | 3.78                 | -236.2                        |
|  <p>3-methyl-2-benzoxazolinone + 2,3-dioxindole <math>\longrightarrow</math> 2-benzoxazolinone + 1-methyl-2,3-dioxindole</p>  | V   | -0.28                | -234.7                        |
|                                                                                                                                                                                                                   |     | Mean Value           | $-235.6 \pm 1.0$ <sup>1</sup> |

<sup>1</sup> The assigned uncertainty is an expanded uncertainty of the mean using an appropriate coverage factor,  $k = 2.776$ , to provide a level of confidence of 0.95.

**Table S6.** Gas-phase hypothetical reactions for **6NBOA** and corresponding values for the enthalpies of reaction,  $\Delta_r H_m^\circ$ , and formation,  $\Delta_f H_m^\circ$ , in the gaseous phase, at  $T = 298.15$  K (values in  $\text{kJ}\cdot\text{mol}^{-1}$ ).

| Gas-phase hypothetical reactions                                                                                                                                                                                         | Eq. | $\Delta_r H_m^\circ$ | $\Delta_f H_m^\circ$          |
|--------------------------------------------------------------------------------------------------------------------------------------------------------------------------------------------------------------------------|-----|----------------------|-------------------------------|
| 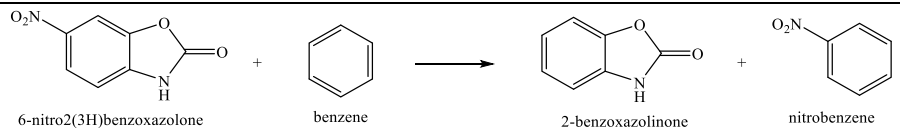 <p>6-nitro2(3H)benzoxazolone + benzene <math>\rightarrow</math> 2-benzoxazolinone + nitrobenzene</p>                                  | I   | -4.42                | -229.7                        |
|  <p>6-nitro2(3H)benzoxazolone + 2,1,3-benzothiadiazole <math>\rightarrow</math> 2-benzoxazolinone + 4-nitro-2,1,3-benzothiadiazole</p> | II  | 23.92                | -235.7                        |
|  <p>6-nitro2(3H)benzoxazolone + naphthalene <math>\rightarrow</math> 2-benzoxazolinone + 1-nitronaphthalene</p>                        | III | 10.43                | -234.7                        |
|  <p>6-nitro2(3H)benzoxazolone + indole <math>\rightarrow</math> 2-benzoxazolinone + 5-nitroindole</p>                                  | IV  | -11.84               | -234.6                        |
|  <p>6-nitro2(3H)benzoxazolone + quinoline <math>\rightarrow</math> 2-benzoxazolinone + 5-nitroquinoline</p>                           | V   | 10.85                | -226.9                        |
|                                                                                                                                                                                                                          |     | Mean Value           | $-232.3 \pm 4.7$ <sup>1</sup> |

<sup>1</sup> The assigned uncertainty is an expanded uncertainty of the mean using an appropriate coverage factor,  $k = 2.776$ , to provide a level of confidence of 0.95.



**Table S7.** Gas-phase hypothetical reactions for **BOA** and corresponding values for the enthalpies of reaction,  $\Delta_r H_m^\circ$ , and formation,  $\Delta_f H_m^\circ$ , in the gaseous phase, at  $T = 298.15$  K (values in  $\text{kJ}\cdot\text{mol}^{-1}$ ).

| Gas-phase hypothetical reactions                                                                                                                                                   | Eq. | $\Delta_r H_m^\circ$ | $\Delta_f H_m^\circ$          |
|------------------------------------------------------------------------------------------------------------------------------------------------------------------------------------|-----|----------------------|-------------------------------|
| 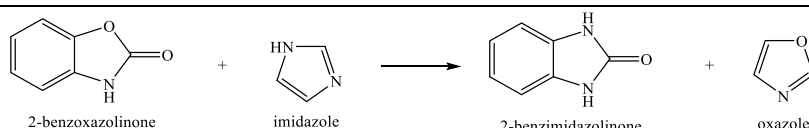 <p>2-benzoxazolinone + imidazole <math>\longrightarrow</math> 2-benzimidazolinone + oxazole</p> | I   | 7.33                 | -219.6                        |
|  <p>2-benzoxazolinone + imidazole <math>\longrightarrow</math> 3-indazolinone + oxazole</p>      | II  | 144.40               | -222.8                        |
|  <p>2-benzoxazolinone + thiazole <math>\longrightarrow</math> 2-benzothiazolinone + oxazole</p>  | III | 18.20                | -219.4                        |
|  <p>2-benzoxazolinone + Indene <math>\longrightarrow</math> Oxindole + Benzofuran</p>            | IV  | 7.03                 | -223.6                        |
|                                                                                                                                                                                    |     | Mean Value           | $-221.4 \pm 3.4$ <sup>1</sup> |

<sup>1</sup> The assigned uncertainty is an expanded uncertainty of the mean using an appropriate coverage factor,  $k = 3.182$ , to provide a level of confidence of 0.95.

**Table S8.** G3MP2B3 absolute enthalpies (in *Hartrees*\*) and experimental enthalpies of formation (in  $\text{kJ}\cdot\text{mol}^{-1}$ ), in the gaseous phase, at  $T = 298.15\text{ K}$ , for the studied compounds and the auxiliary molecules used in the gas-phase working reactions.

| Compounds studied / auxiliary molecules | G3MP2B3 absolute enthalpies | Experimental enthalpies of formation (298.15 K) |
|-----------------------------------------|-----------------------------|-------------------------------------------------|
| 3-Methyl-2-benzoxazolinone              | -513.535373                 | $(-239.7 \pm 3.2)^1$                            |
| 6-Nitro-2-benzoxazolinone               | -678.598843                 | $(-229.9 \pm 3.7)^1$                            |
| 1 <i>H</i> -imidazole                   | -225.873394                 | $(132.9 \pm 0.6)$ [S9]                          |
| 1-Methylimidazole                       | -265.103073                 | $(125.7 \pm 1.1)$ [S10]                         |
| 2-Benzoxazolinone                       | -474.301846                 | $(-219.0 \pm 2.8)$ [S9]                         |
| Indole                                  | -363.214962                 | $(164.3 \pm 1.3)$ [S9]                          |
| 1-Methylindole                          | -402.445506                 | $(155.8 \pm 2.8)$ [S9]                          |
| Pyrrole                                 | -209.822531                 | $(108.4 \pm 0.6)$ [S9]                          |
| 1-Methylpyrrole                         | -249.051695                 | $(103.1 \pm 0.5)$ [S9]                          |
| 2-Pyrrolidinone                         | -286.188826                 | $(-197.4 \pm 3.1)$ [S9]                         |
| 1-Methyl-1-pyrrolidinone                | -325.420913                 | $(-210.9 \pm 0.6)$ [S9]                         |
| 2,3-Dioxindole                          | -512.331688                 | $(-133.0 \pm 5.6)$ [S9]                         |
| 1-Methyl-2,3-dioxindole                 | -551.565323                 | $(-148.6 \pm 4.4)$ [S9]                         |
| Benzene                                 | -231.835164                 | $(82.6 \pm 0.7)$ [S9]                           |
| Nitrobenzene                            | -436.133844                 | $(67.5 \pm 0.5)$ [S9]                           |
| 2,1,3-Benzothiadiazole                  | -737.775911                 | $(276.5 \pm 2.5)$ [S11]                         |
| 4-Nitro-2,1,3-benzothiadiazole          | -942.063797                 | $(283.7 \pm 4.9)$ [S12]                         |
| Naphthalene                             | -385.223727                 | $(150.3 \pm 1.4)$ [S9]                          |
| 1-Nitronaphthalene                      | -589.516753                 | $(145.0 \pm 1.9)$ [S13]                         |
| 5-Nitroindole                           | -567.51647                  | $(136.9 \pm 2.1)$ [S14]                         |
| Quinoline                               | -401.263696                 | $(200.5 \pm 0.9)$ [S15]                         |
| 5-Nitroquinoline                        | -605.556561                 | $(203.4 \pm 2.6)$ [S16]                         |
| Oxazole                                 | -245.727307                 | $(-15.5 \pm 0.5)$ [S9]                          |
| Thiazole                                | -568.350825                 | $[151.5]^2$                                     |
| 3-Indazolinone                          | -454.392934                 | $(70.0 \pm 2.2)$ [S9]                           |
| Indene                                  | -347.156638                 | $(163.4 \pm 2.0)$ [S9]                          |
| Oxindole                                | -438.385869                 | $(-66.8 \pm 3.2)$ [S9]                          |
| 2-Benzimidazolinone                     | -454.445141                 | $(-63.9 \pm 2.9)$ [S9]                          |
| 2-Benzothiazolinone                     | -796.918431                 | $(-34.2 \pm 2.7)$ [S9]                          |

<sup>1</sup> This work. <sup>2</sup> Value estimated at the G3(MP2)//B3LYP level of theory.

\* 1 Hartree =  $2625.5\text{ kJ}\cdot\text{mol}^{-1}$

**Table S9.** Harmonic vibrational frequencies (scaling vibrational frequencies by 1.0029 [S17]) .

| 2-benzoxazolinone |        | 3-methyl-2- benzoxazolinone |        | 6-nitro-2-benzoxazolinone |        |
|-------------------|--------|-----------------------------|--------|---------------------------|--------|
| 126.0             | 1279.7 | 121.9                       | 1120.4 | 61.8                      | 964    |
| 243.3             | 1295.8 | 129.4                       | 1153.2 | 92.5                      | 966.5  |
| 318.2             | 1313.2 | 138.3                       | 1172.2 | 164.4                     | 1080   |
| 320.7             | 1368.9 | 241.8                       | 1193.7 | 188.6                     | 1132.4 |
| 419.8             | 1446.3 | 263.5                       | 1255.8 | 270.5                     | 1165.5 |
| 463.3             | 1530.8 | 334.8                       | 1302.2 | 335.6                     | 1271.4 |
| 511.5             | 1532.6 | 341.6                       | 1347.8 | 347.3                     | 1286.2 |
| 577.1             | 1681.4 | 439.1                       | 1402.4 | 354.6                     | 1306.3 |
| 580.6             | 1682.9 | 507.7                       | 1436.9 | 433.1                     | 1363.3 |
| 629.4             | 1918.2 | 569.5                       | 1478.8 | 470.1                     | 1395.6 |
| 708.5             | 3206.4 | 580.7                       | 1522   | 525.3                     | 1462.2 |
| 733.3             | 3218.7 | 636.2                       | 1525.4 | 562.7                     | 1501.6 |
| 744.3             | 3228.0 | 692.9                       | 1539.4 | 579.5                     | 1533.4 |
| 759.5             | 3241.5 | 729.5                       | 1546.9 | 597.8                     | 1637.7 |
| 860.2             | 3683.8 | 740.1                       | 1673.3 | 698.8                     | 1677.9 |
| 870.6             |        | 754.1                       | 1684.3 | 717.6                     | 1686.5 |
| 903.0             |        | 759.6                       | 1895.5 | 723.8                     | 1930.9 |
| 922.9             |        | 859.3                       | 3064   | 744.5                     | 3232.3 |
| 940.1             |        | 886                         | 3122.1 | 752.9                     | 3268.3 |
| 968.9             |        | 921.1                       | 3185.9 | 838.1                     | 3280.6 |
| 1043.4            |        | 957.5                       | 3205.7 | 841.2                     | 3682.8 |
| 1112.1            |        | 968.9                       | 3219   | 885.1                     |        |
| 1164.2            |        | 1043.2                      | 3228.5 | 913.2                     |        |
| 1193.4            |        | 1070.6                      | 3240.6 | 935.4                     |        |

## REFERENCES

- [S1] Coops, J.; Jessup, R.S.; van Nes, K. In *Experimental Thermochemistry*. Rossini, F.D. Ed. Vol. 1, Interscience, New York, 1956, Chapter 3.
- [S2] Washburn, E.W. Standard states for bomb calorimetry. *J. Res. Nat. Bur. Stand.* **1933**, *10*, 525-558.
- [S3] Vogel, A.I. *Quantitative Inorganic Analysis*; Longman: London, 1978.
- [S4] Wagman, D.D.; Evans, W.H.; Parker, V.B.; Schumm, R.H.; Halow, I.; Bailey, S.M.; Churney, K.L.; Nuttall, R.L. *J. Phys. Chem. Ref. Data* **1982**, *11*(suppl. 2).
- [S5] Medvedev, V.A.; Cox, J.D.; Wagman, D.D. (Eds). (1989) CODATA key values for thermodynamics. New York: Hemisphere Publishing Corporation.
- [S6] Yaws, C.L. *Thermophysical Properties of Chemicals and Hydrocarbons*, 2008, William Andrew Inc., USA
- [S7] [https://www.chemicalbook.com/ChemicalProductProperty\\_US\\_CB6747758.aspx](https://www.chemicalbook.com/ChemicalProductProperty_US_CB6747758.aspx)
- [S8] Hurst, J.E.; Harrison, B.K. Estimation of liquid and solid heat capacities using a modified Kopp's rule. *Chem. Eng. Comm.* **1992**, *112*, 21-30.
- [S9] Pedley, J.P. *Thermochemical data and structures of organic compounds*. Thermodynamics Research Centre, College Station, TX, 1994.
- [S10] Verevkin, S.P.; Zaitsau, D.H.; Emel'yanenko, V.N.; Paulechka, Y.U.; Blokhin, A.V.; Bazyleva, A.B.; Kabo, G.J. Thermodynamics of ionic liquids precursors: 1-methylimidazole. *J. Phys. Chem. B* **2011**, *115*, 15, 4404-4411.

- 
- [S11] Miranda, M.S.; Matos, M.A.R.; Morais, V.M.; Liebman, J.F. (2012). 2,1,3-Benzothiadiazole: Study of its structure, energetics and aromaticity. *J. Chem. Thermodyn.* **2012**, *50*, 30-36.
- [S12] Ribeiro da Silva, M.D.M.C.; Freitas V.L.S.; Vieira M.A.A.; Sottomayor, M.J.; Acree Jr. W.E. Energetic and structural properties of 4-nitro-2,1,3-benzothiadiazole. *J. Chem. Thermodyn.* 2012, *49*, 146–153.
- [S13] Ribeiro da Silva, M.A.V.; Amaral, L.M.P.F.; Santos, A.F.L.O.M.; Gomes, J.R.B. Thermochemistry of nitronaphthalenes and nitroanthracenes. *J. Chem. Thermodyn.* **2006**, *38*, 748-755.
- [S14] Ribeiro da Silva, M.A.V.; Cabral, J. I.T.A. Experimental study on the thermochemistry of 5-nitroindole and 5-nitroindoline. *J. Chem. Thermodyn.* **2009**, *41*, 355-360.
- [S15] Steele, W.V.; Archer, D.G.; Chirico, R.D.; Collier, W.B.; Hossenlopp, I.A.; Nguyen, A.; Smith, N.K.; Gammon, B.E. *J. Chem. Thermodyn.* **1988**, *20*, 1233-1264.
- [S16] Ribeiro da Silva, M.A.V.; Matos, M.A.R.; Amaral, L.M.P.F. Enthalpies of combustion, vapour pressures, and enthalpies of sublimation of 5-, 6-, and 8-nitroquinoline and 8-nitroquinaldine. *J. Chem. Thermodyn.* **1997**, *29*, 298-303.
- [S17] Merrick, J.P.; Moran, D.; Radom, L. An Evaluation of Harmonic Vibrational Frequency Scale Factors, *J. Phys. Chem. A* **2007**, *111*, 11683–11700.
